# Supplementary material for: Impact of urbanization on thermal environment of Chengdu-Chongqing Urban Agglomeration under complex terrain
Source: Copernicus journal article supplement (doi:10.5194/esd-2021-22), 2021-06-30
Supplement: Supplementary file [file esd-2021-22-AC1-supplement.pdf]

## **Response to Reviewers#1**

Dear Reviewers#1,

Thank you very much for your time involved in reviewing the manuscript and your very encouraging comments on the merits. To facilitate this discussion, we first retype your comments in *italic font* and then present our responses to the comments.

**Comment 1:** *“This manuscript consists into a relevant study for the study of the urban heat island effect by including the influence of the surrounding topography. The document is well written, presenting a high-quality work in a clear and organized way.”*

**Response 1:** We appreciate your clear and detailed feedback and hope that the response has fully addressed all your concerns.

**Comment 2:** *“Before publication, I would like to see a small improvement in this document comprehending the future scenario. As a reader, I felt that there is little detailed information to understand the extension and magnitude of the modifications implemented in the future scenario to induce the results.”. “For instance, to a naked eye, such modifications are not visible in figure 2. My suggestion to the authors is to increase the figure 2 (increase also the legend)”*

**Response 2:** We add the sub-figure Fig. 3 on the scope of the future land use Scenario designed and planned to illustrate the extension and magnitude of the modifications implemented in the future scenario. Fig. 3 is the location diagram of the protection area for future land use planning designed based on “*Chengdu Chongqing Urban Agglomeration Development Plan, 2014-2020*” and “*Guidelines for Ecological Protection and Restoration Project of Mountains, Rivers, Forests, Fields, Lakes and Grasses, 2020, (Trial Version)*”. The two documents include a series of ecological and environmental protection measures such as returning farmland to forests and grasses and expanding lake water system wetlands. Please refer to lines 25-37 on page 4 and lines 1-15 on page 5 in the revised version of the manuscript.

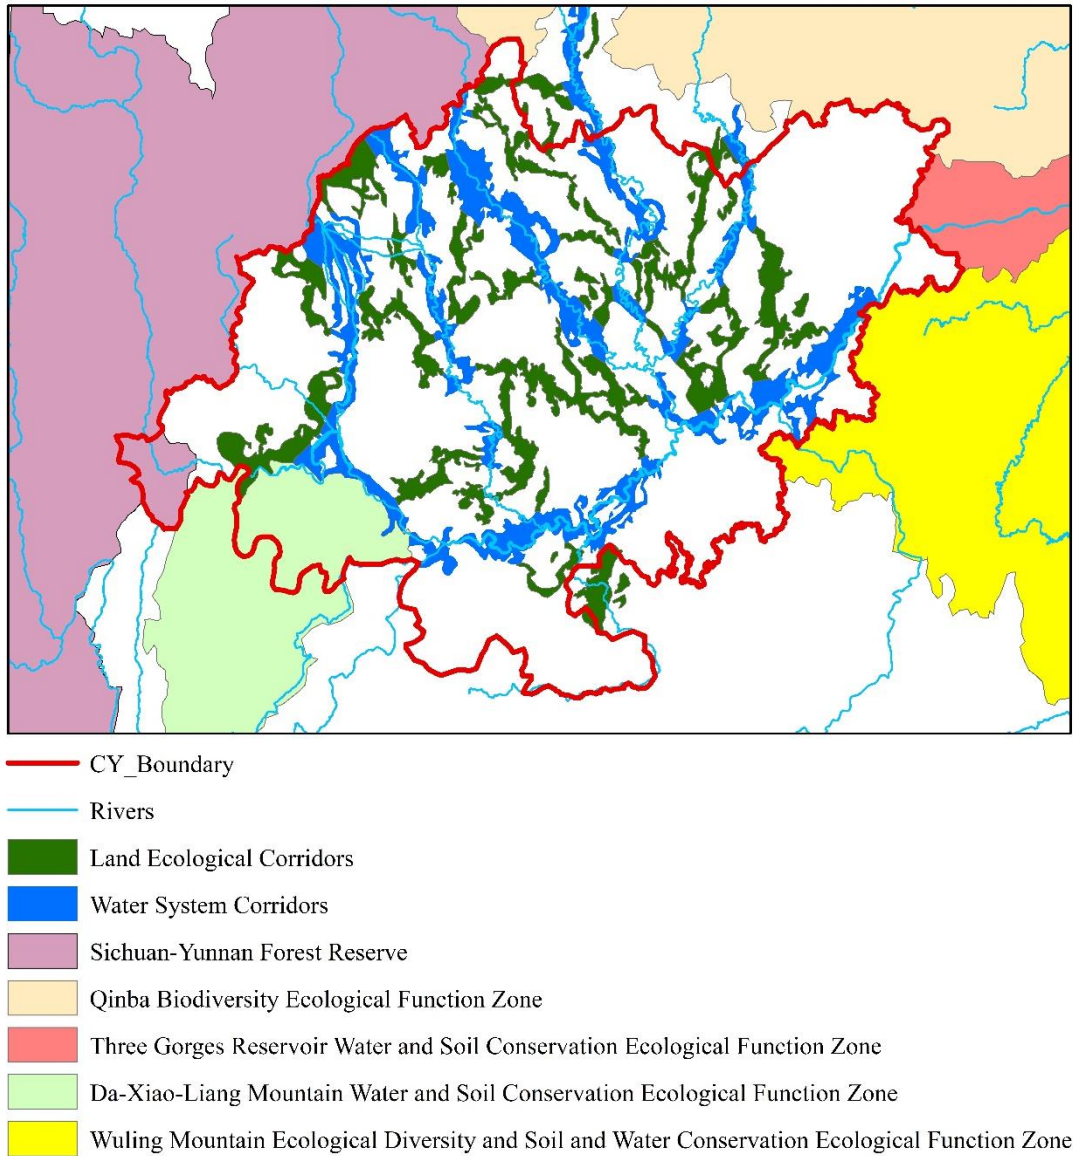

**Fig. 3 Scope of future land use scenarios planned through government policy documents.**

We would like to take this opportunity to thank you for all your time involved and this great opportunity for us to improve the manuscript. We hope you will find this revised version satisfactory.

Sincerely,

Si Chen, Zhenghui Xie, et al.
